# Supplementary material
Source: Springer Nature journal article supplement (https://www.springermedizin.de/resource/supplementary/12936_2013_2671_MOESM11_ESM.pdf/9545084)

Pre-prandial killing effect

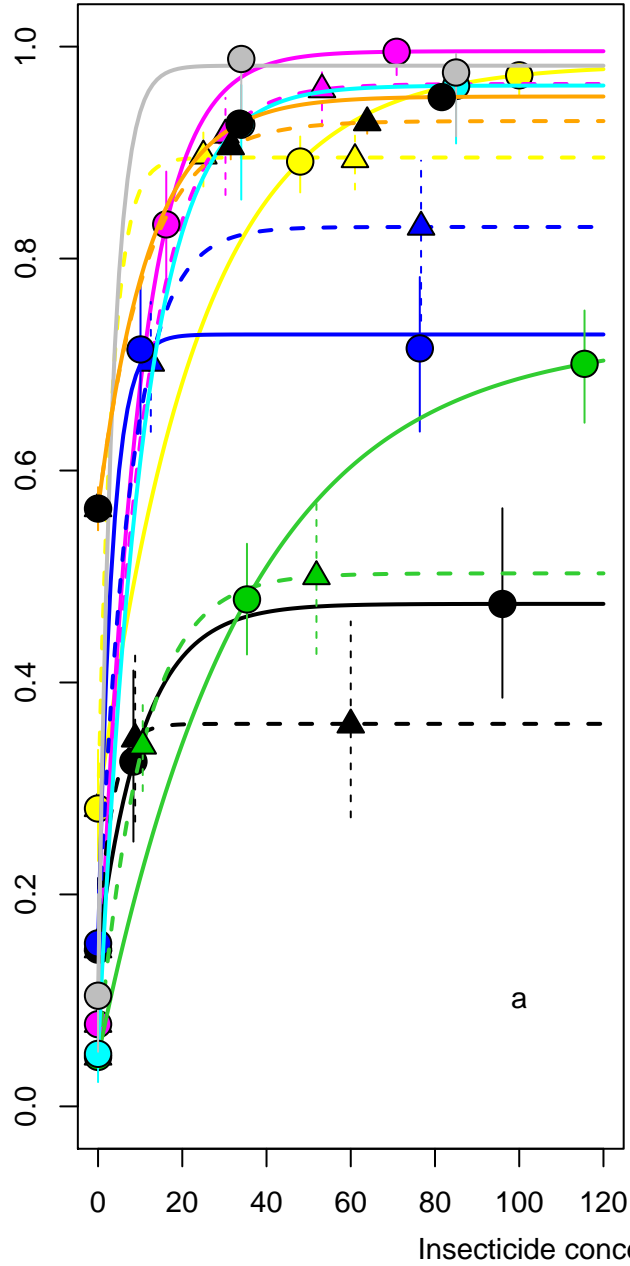

a

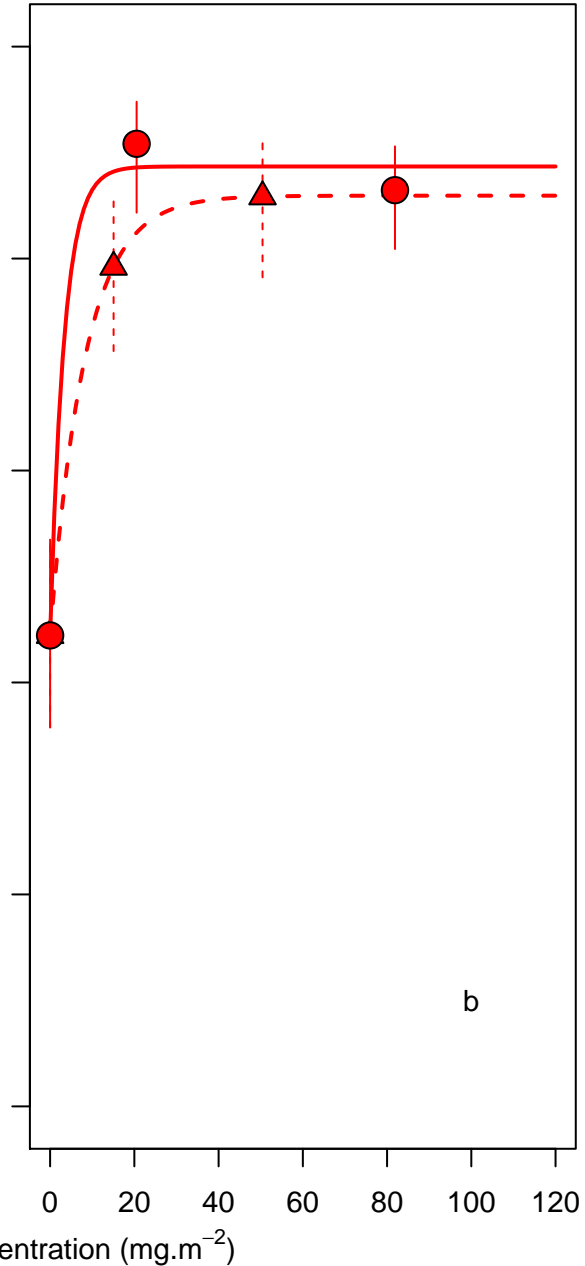

b

Insecticide concentration (mg.m<sup>-2</sup>)

Supplement: MOESM11 [file 9545084]
